# Supplementary material for: Selective catalytic reduction of NO over Cu-AFX zeolites: mechanistic insights from in situ/operando spectroscopic and DFT studies
Source: Royal Society of Chemistry journal article supplement (doi:10.1039/d1cy00282a), 2021-01-01
Supplement: d1cy00282a1.pdf [file d1cy00282a1.pdf]

ELECTRONIC SUPPLEMENTARY INFORMATION

# Selective catalytic reduction of NO over Cu-AFX zeolites: Mechanistic insights from *in situ/operando* spectroscopic and DFT studies

Chong Liu,<sup>\*,§</sup> Hiroe Kubota,<sup>†</sup> Takehiro Amada,<sup>†</sup> Takashi Toyao,<sup>†,‡</sup> Zen Maeno,<sup>†</sup> Masaru Ogura,<sup>#</sup> Naoto Nakazawa,<sup>||</sup> Satoshi Inagaki,<sup>||</sup> Yoshihiro Kubota,<sup>||</sup> Ken-ichi Shimizu<sup>\*,†,‡</sup>

<sup>§</sup> State Key Laboratory of Structural Chemistry, Fujian Institute of Research on the Structure of Matter, Chinese Academy of Sciences, Fuzhou, Fujian 350002, China

<sup>†</sup> Institute for Catalysis, Hokkaido University, N-21, W-10, Sapporo 001-0021, Japan

<sup>‡</sup> Elements Strategy Initiative for Catalysts and Batteries, Kyoto University, Katsura, Kyoto 615-8520, Japan

<sup>#</sup> Institute of Industrial Science, The University of Tokyo, 4-6-1 Komaba, Meguro-ku, Tokyo 153-8505, Japan

<sup>||</sup> Division of Materials Science and Chemical Engineering, Yokohama National University, 79-5 Tokiwadai, Hodogaya-ku, Yokohama 240-8501, Japan

Corresponding authors

\*Ken-ichi Shimizu ([kshimizu@cat.hokudai.ac.jp](mailto:kshimizu@cat.hokudai.ac.jp))

\*Chong Liu ([chongliu@fjirsm.ac.cn](mailto:chongliu@fjirsm.ac.cn))

## Detailed descriptions of *in situ/operando* spectroscopic experiments

### *In situ* XAS

Cu K-edge quick XAS measurements were performed in transmission mode using beamline BL14B2 at the SPring-8 synchrotron radiation facility (Harima, Japan). The storage ring was operated at 8 GeV. A Si(111) single crystal was used to obtain a monochromatic X-ray beam. A self-supported wafer form of the sample with ca. 7 mm diameter was placed in a quartz *in situ* cell in a 10% O<sub>2</sub> flow diluted with He (1000 mL min<sup>-1</sup>) under atmospheric pressure. Normalization and linear combination fitting (LCF) analysis of XANES were carried out by using Athena software<sup>1</sup>. XAS spectra for the reference compounds were collected using equivalent data collection procedures with specific acquisition parameters optimized for each sample, either measured after *in situ* treatment of Cu-AFX (Z-[Cu<sup>2+</sup>]; Z = zeolite framework) or prepared as solution-phase complexes according to the literatures<sup>2,3</sup>. The Cu-AFX (Si/Al = 5.3) with 4.1 wt% of Cu loading exposed to 10% O<sub>2</sub> flow (20 min) at 200 °C was used as a reference for Z-[Cu<sup>2+</sup>]. The [Cu(NH<sub>3</sub>)<sub>4</sub>]<sup>2+</sup> solution was prepared by pouring 0.15 mL of 10% NH<sub>3</sub> aqueous solution into 50 mL of aqueous solution containing tetraamminecopper(II) sulfate hydrate (50 mM). The resulting deep violet-blue solution was used for a reference. The [Cu(NH<sub>3</sub>)<sub>2</sub>]<sup>+</sup> solution was prepared by adding 0.03 mL of hydrazine to 50 mL of the [Cu(NH<sub>3</sub>)<sub>4</sub>]<sup>2+</sup> solution described above. It should be noted here that the spectrum was recorded just after the preparation, without exposure to air.

### *In situ/operando* UV-vis

Diffuse reflectance UV-vis measurements were performed at 200 °C with a UV-vis spectrometer (JASCO V-670) equipped with an *in situ* flow cell with a quartz window. A diffuse reflectance sample cell is connected to a gas flow system. The light source was led to the center of an integrating sphere through optical fiber. Reflectance was converted to pseudo-absorbance using the Kubelka-Munk function. BaSO<sub>4</sub> was used to collect a background spectrum. Various gas mixtures were fed to Cu<sub>2.1</sub>-AFX (10 mg) at a flow rate of 100 ml min<sup>-1</sup>. The relative concentration of N<sub>2</sub> in the outlet gas mixture was monitored by the mass spectroscopy apparatus (BELMass, MicrotracBEL Corp.). To prevent changes in the operating pressure of the UV-vis cell, excess flow was removed through a vent. The

product concentration was quantified by calibrating the mass response using a calibrated mixture in Ar of each component.

### ***Operando IR***

IR spectra were recorded on a JASCO FT/IR-4600 equipped with a quartz IR cell connected to a conventional flow reaction system (100 mL min<sup>-1</sup>). The sample was pressed into a 40 mg self-supporting wafer and mounted in the quartz IR cell with CaF<sub>2</sub> windows. Spectra were measured by accumulating 20 scans at a resolution of 4 cm<sup>-1</sup>. The reference spectrum of the catalyst wafer in He taken at the measurement temperature was subtracted from each spectrum. The aforementioned mass spectroscopy apparatus was also used here.

### **Estimation of Cu density and mean Cu-Cu distance in Cu-AFX zeolites**

AFX unit cell contains 48T atoms, and the number of Al and Cu per each unit cell was derived from Si/Al ratio ( $r_{\text{Si/Al}}$ ) and Cu/Al ratio ( $r_{\text{Cu/Al}}$ ):

$$n(\text{Al per cell}) = 48 / (1 + r_{\text{Si/Al}})$$

$$n(\text{Cu per cell}) = r_{\text{Cu/Al}} \times 48 / (1 + r_{\text{Si/Al}})$$

$r_{\text{Cu/Al}}$  was estimated from experimentally measured Cu loading. The parameters of AFX unit cell are  $a = b = 13.70 \text{ \AA}$ ,  $c = 19.73 \text{ \AA}$ , and  $\alpha = \beta = 90^\circ$ ,  $\gamma = 120^\circ$ .

The volume of AFX unit cell ( $V_{\text{AFX}}$ ) was calculated as

$$V_{\text{AFX}} = \left(\frac{\sqrt{3}}{2}\right) \times a \times b \times c$$

which gives a value of  $3207.4 \text{ \AA}^3$ .

The Cu density described by the number of Cu per  $1000 \text{ \AA}^3$  ( $\text{Cu}/1000\text{\AA}^3$ ) was estimated as

$$\text{Cu}/1000\text{\AA}^3 = n(\text{Cu per cell}) \times 1000 / V_{\text{AFX}}$$

The mean Cu-Cu distance was estimated assuming that Cu atoms are homogeneously distributed. Each Cu was considered at the center of a sphere with a radius of R. Then the Cu sphere volume ( $V_{\text{Cu-sphere}}$ ) was calculated as

$$V_{\text{Cu-sphere}} = \left(\frac{4}{3}\right) \times \pi \times R^3$$

This volume was assumed to be same as the volume per Cu calculated from Cu density, which was described as

$$\text{Volume per Cu} = V_{\text{AFX}} / n(\text{Cu per cell})$$

Therefore, the mean Cu-Cu distance can be obtained as

$$\text{Mean Cu-Cu distance} = 2R = 2 \times \sqrt[3]{\frac{\text{Volume per Cu}}{\pi} \times \frac{3}{4}}$$

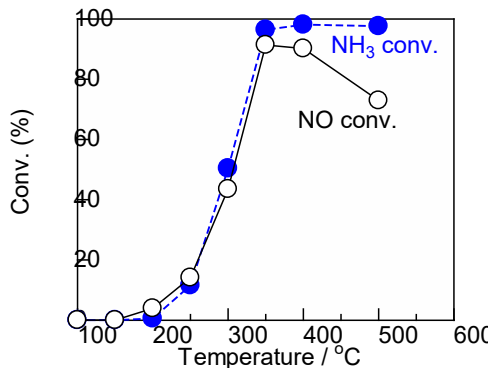

**Fig. S1** Catalytic result for NH<sub>3</sub>-SCR by Cu<sub>4.1</sub>-AFX with a laboratory reactor at the same reaction conditions as for *in situ* XANES (Fig. 2). Conditions: catalyst weight = 3.8 mg; 1000 ppm NH<sub>3</sub>, 1000 ppm NO, 10% O<sub>2</sub>, He balance (1000 mL min<sup>-1</sup>).

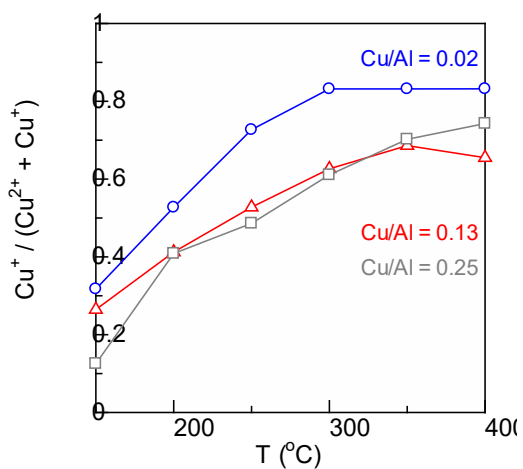

**Fig. S2** Effect of temperature on the fraction of Cu(I) species in the Cu-AFX samples during the steady-state  $\text{NH}_3$ -SCR reactions. The fractions are determined from the results of *in situ* XANES experiments shown in Fig. 2.

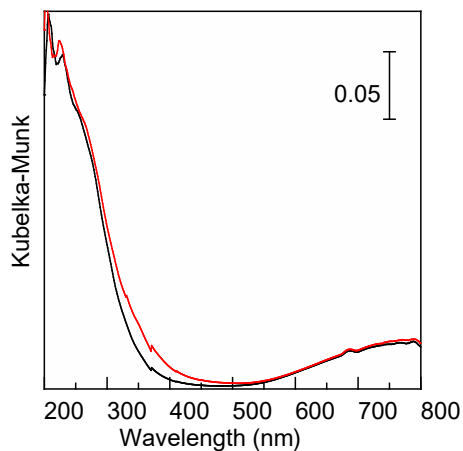

**Fig. S3** *In situ* UV-vis spectra of Cu<sub>3.2</sub>-AFX at 150 °C under 10% O<sub>2</sub> for 10 min (black), followed by flowing 500 ppm NO for 10 min (red). The Cu<sub>3.2</sub>-AFX sample was prepared by the same method as described in man text (*Section 2.1*).

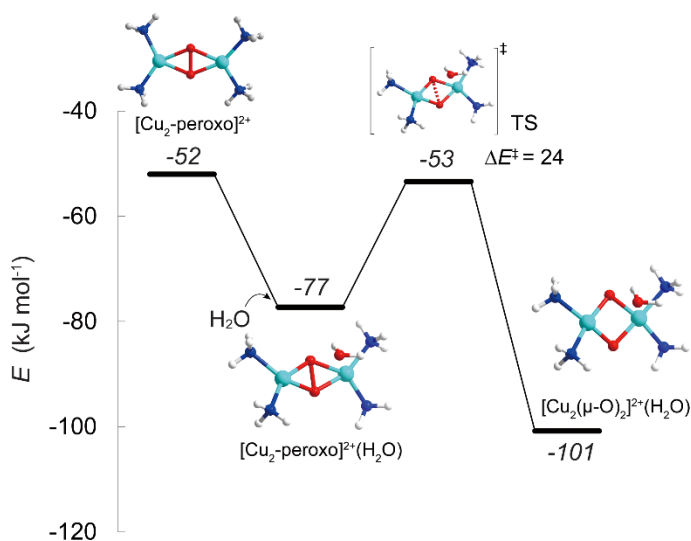

**Fig. S4** Conversion of dimeric  $[\text{Cu}_2\text{-peroxo}]^{2+}$  to  $[\text{Cu}_2(\mu\text{-O})_2]^{2+}$  with a vicinal water as spectator in Cu-AFX. The CI-NEB calculations suggest that the hydrolysis reaction from  $[\text{Cu}_2\text{-peroxo}]^{2+}(\text{H}_2\text{O})$  occurs via a stepwise mechanism in which  $[\text{Cu}_2(\mu\text{-O})_2]^{2+}(\text{H}_2\text{O})$  is first generated and then hydrolyzed via the reaction pathway as described in Fig. 10.

## References

- 1 B. Ravel and M. Newville, *J. Synchrotron Radiat.*, 2005, **12**, 537–541.
- 2 K. A. Lomachenko, E. Borfecchia, C. Negri, G. Berlier, C. Lamberti, P. Beato, H. Falsig and S. Bordiga, *J. Am. Chem. Soc.*, 2016, **138**, 12025–12028.
- 3 T. V. W. Janssens, H. Falsig, L. F. Lundegaard, P. N. R. Vennestrøm, S. B. Rasmussen, P. G. Moses, F. Giordanino, E. Borfecchia, K. A. Lomachenko, C. Lamberti, S. Bordiga, A. Godiksen, S. Mossin and P. Beato, *ACS Catal.*, 2015, **5**, 2832–2845.
